# Supplementary material
Source: publisher figshare collection journal article supplement (https://frontiersin.figshare.com/ndownloader/files/24089006)
Supplement: Supplementary file [file 24089006]

**Table S2.** Daily physical activities during ND and KD

| Steps | Week 1      | Week 2      | Week 3      | Week 4      |
|-------|-------------|-------------|-------------|-------------|
| ND    | 8193 (2844) | 8138 (2821) | 8954 (1620) | 7898 (2295) |
| KD    | 7463 (2236) | 8246 (2775) | 8346 (2906) | 8046 (2028) |

Outcome variables are presented as mean (standard deviation). ND: normal diet, KD: ketogenic diet.
